# Supplementary material
Source: PubMed Central journal article supplement (PMC8419689)
Supplement: EMBR-22-e52252-s004.pdf [file EMBR-22-e52252-s004.pdf]

## Expanded View Figures

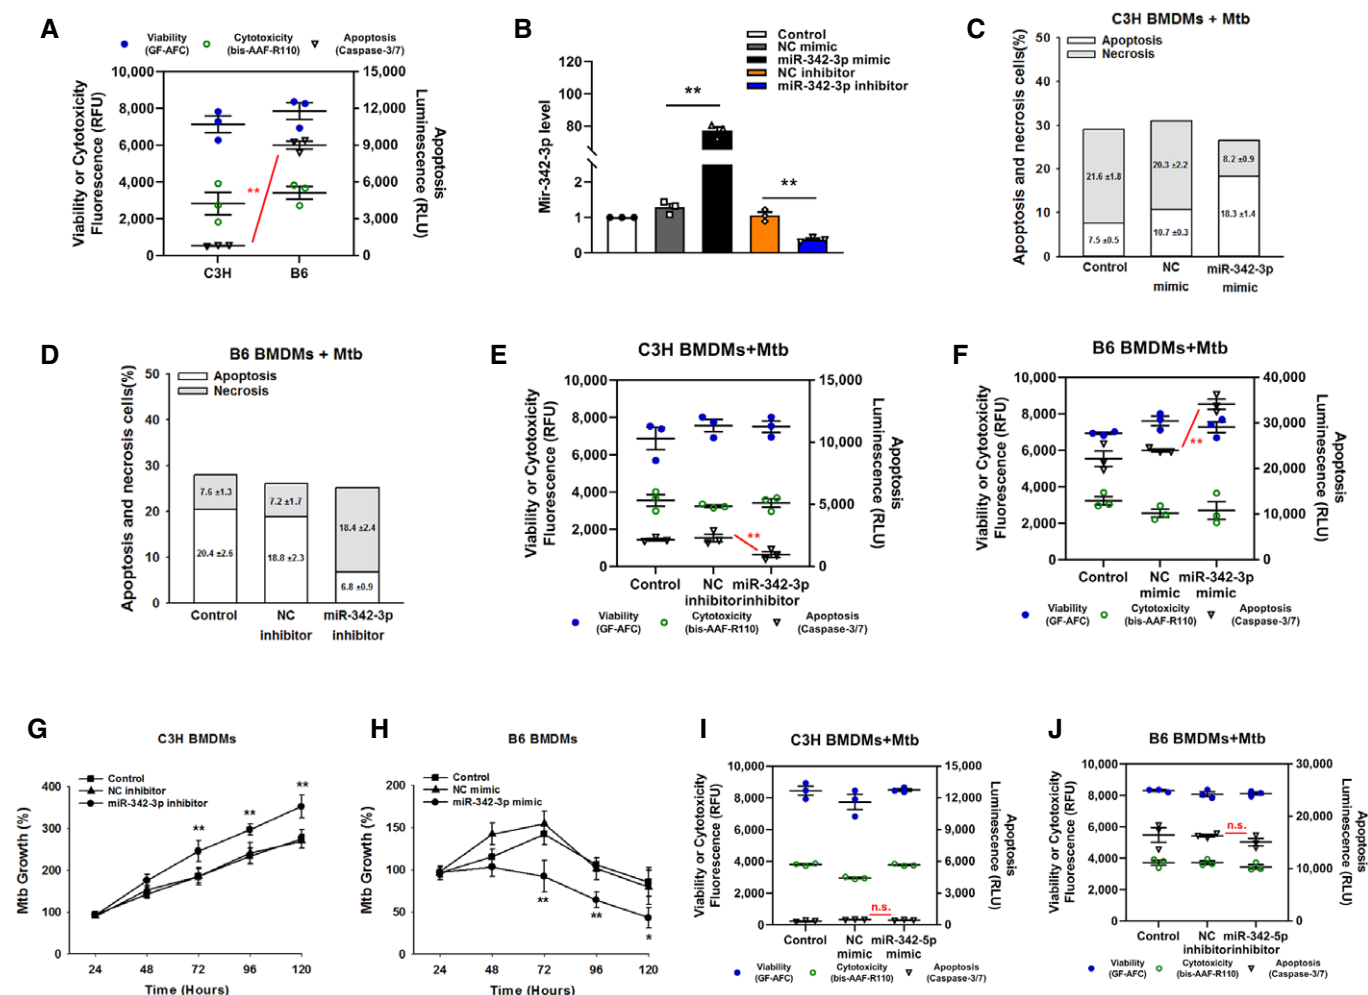

**Figure EV1. MiR-342-3p is associated with TB susceptibility.**

- A Cell death mechanisms of C3H and B6 BMDMs after stimulation with Mtb for 36 h. Data are shown as the mean  $\pm$  SEM of  $n = 3$  biological replicates.
- B Relative miRNA expression was detected by qRT-PCR using miR-342-3p specific primer. Data are shown as the mean  $\pm$  SEM of  $n = 3$  biological replicates.
- C, D Cell death mechanisms of C3H BMDMs transfected with miR-342-3p mimic (C), or B6 BMDMs transfected with miR-342-3p inhibitor (D), followed by Mtb infection for 36 h. Representative data (from  $n = 3$  biological replicates) are shown as the mean  $\pm$  SEM of technical replicates.
- E, F Cell death mechanisms of C3H BMDMs transfected with miR-342-3p inhibitor (E), or B6 BMDMs transfected with miR-342-3p mimic (F), followed by Mtb infection for 36 h. Data are shown as the mean  $\pm$  SEM of  $n = 3$  biological replicates.
- G, H Mtb growth rates of C3H BMDMs transfected with miR-342-3p inhibitor (G), or B6 BMDMs transfected with miR-342-3p mimic (H) after Mtb infection. Data are shown as the mean  $\pm$  SEM of  $n = 3$  biological replicates.
- I, J Cell death mechanisms of C3H BMDMs transfected with miR-342-3p mimic (I), or B6 BMDMs transfected with miR-342-3p inhibitor (J), followed by Mtb infection for 36 h. Data are shown as the mean  $\pm$  SEM of  $n = 3$  biological replicates.

Data information: ANOVA followed by Bonferroni post *hoc* test was used for data analysis (A, B, E-J). \* $P < 0.05$ , \*\* $P < 0.01$ . Abbreviation: n.s., not significant. NC, negative control.

Source data are available online for this figure.

**Figure EV2. MiR-342-3p directly targets SOCS6 to regulate anti-Mtb immunity.**

- A Relative expressions of miR-342-2p target genes were analyzed by qRT-PCR. Data are shown as the mean  $\pm$  SEM of  $n = 3$  biological replicates.
- B Cell death mechanisms of RAW264.7 cells transfected with siRNA, followed by Mtb infection for 36 h. Representative data (from  $n = 3$  biological replicates) are shown as the mean  $\pm$  SEM of technical replicates.
- C, D MiR-342-3p mimic or inhibitor was transfected to RAW264.7 macrophages. After 48 h, cells were collected for qRT-PCR (C, data are shown as the mean  $\pm$  SEM of  $n = 3$  biological replicates) and Western blotting (D, representative blots from  $n = 3$  biological replicates are shown) to detect the relative levels of SOCS6.
- E C3H BMDMs were transfected with miR-342-3p mimic or SOCS6-overexpressing lentivirus, followed by Mtb infection. Cell death mechanisms were analyzed, respectively. Representative data (from  $n = 3$  biological replicates) are shown as the mean  $\pm$  SEM of technical replicates.
- F B6 BMDMs were transfected with miR-342-3p inhibitor or *Socs6* siRNA, followed by Mtb infection. Cell death mechanisms were analyzed, respectively. Representative data (from  $n = 3$  biological replicates) are shown as the mean  $\pm$  SEM of technical replicates.
- G, H SOCS6-overexpressing vector (G) or *Socs6* siRNA (H) was mixed with polyethylenimine to form a complex, which was used to infect mice by tail vein injection (N/P ratio=8). Lungs were collected for transfection efficiency validation. Data are shown as the mean  $\pm$  SEM of  $n = 3$  biological replicates.
- I Alveolar macrophages from mice treated with SOCS6-overexpressing vector or *Socs6* siRNA were collected to analyze cell death mechanisms. Data are shown as the mean  $\pm$  SEM of  $n = 3$  biological replicates.
- J, K Secretion of cytokines TNF- $\alpha$ , IL-1, IL-6, and CXCL15 in BMDMs obtained from *Mir342*<sup>-/-</sup> B6 and *Mir342*<sup>-/-</sup> B6 mice supplemented with *Socs6* siRNA (J), or from *Mir342*<sup>+/+</sup> C3H and *Mir342*<sup>+/+</sup> C3H mice supplemented with SOCS6-overexpressing vector (K), was detected by ELISA after Mtb stimulation. Data are shown as the mean  $\pm$  SEM of  $n = 3$  biological replicates.

Data information: ANOVA followed by Bonferroni post hoc test (A, C, I-K) and two-tailed Student t test (G, H) were used for data analysis. \* $P < 0.05$ , \*\* $P < 0.01$ .

Abbreviations: n.s., not significant. NC, negative control.

Source data are available online for this figure.

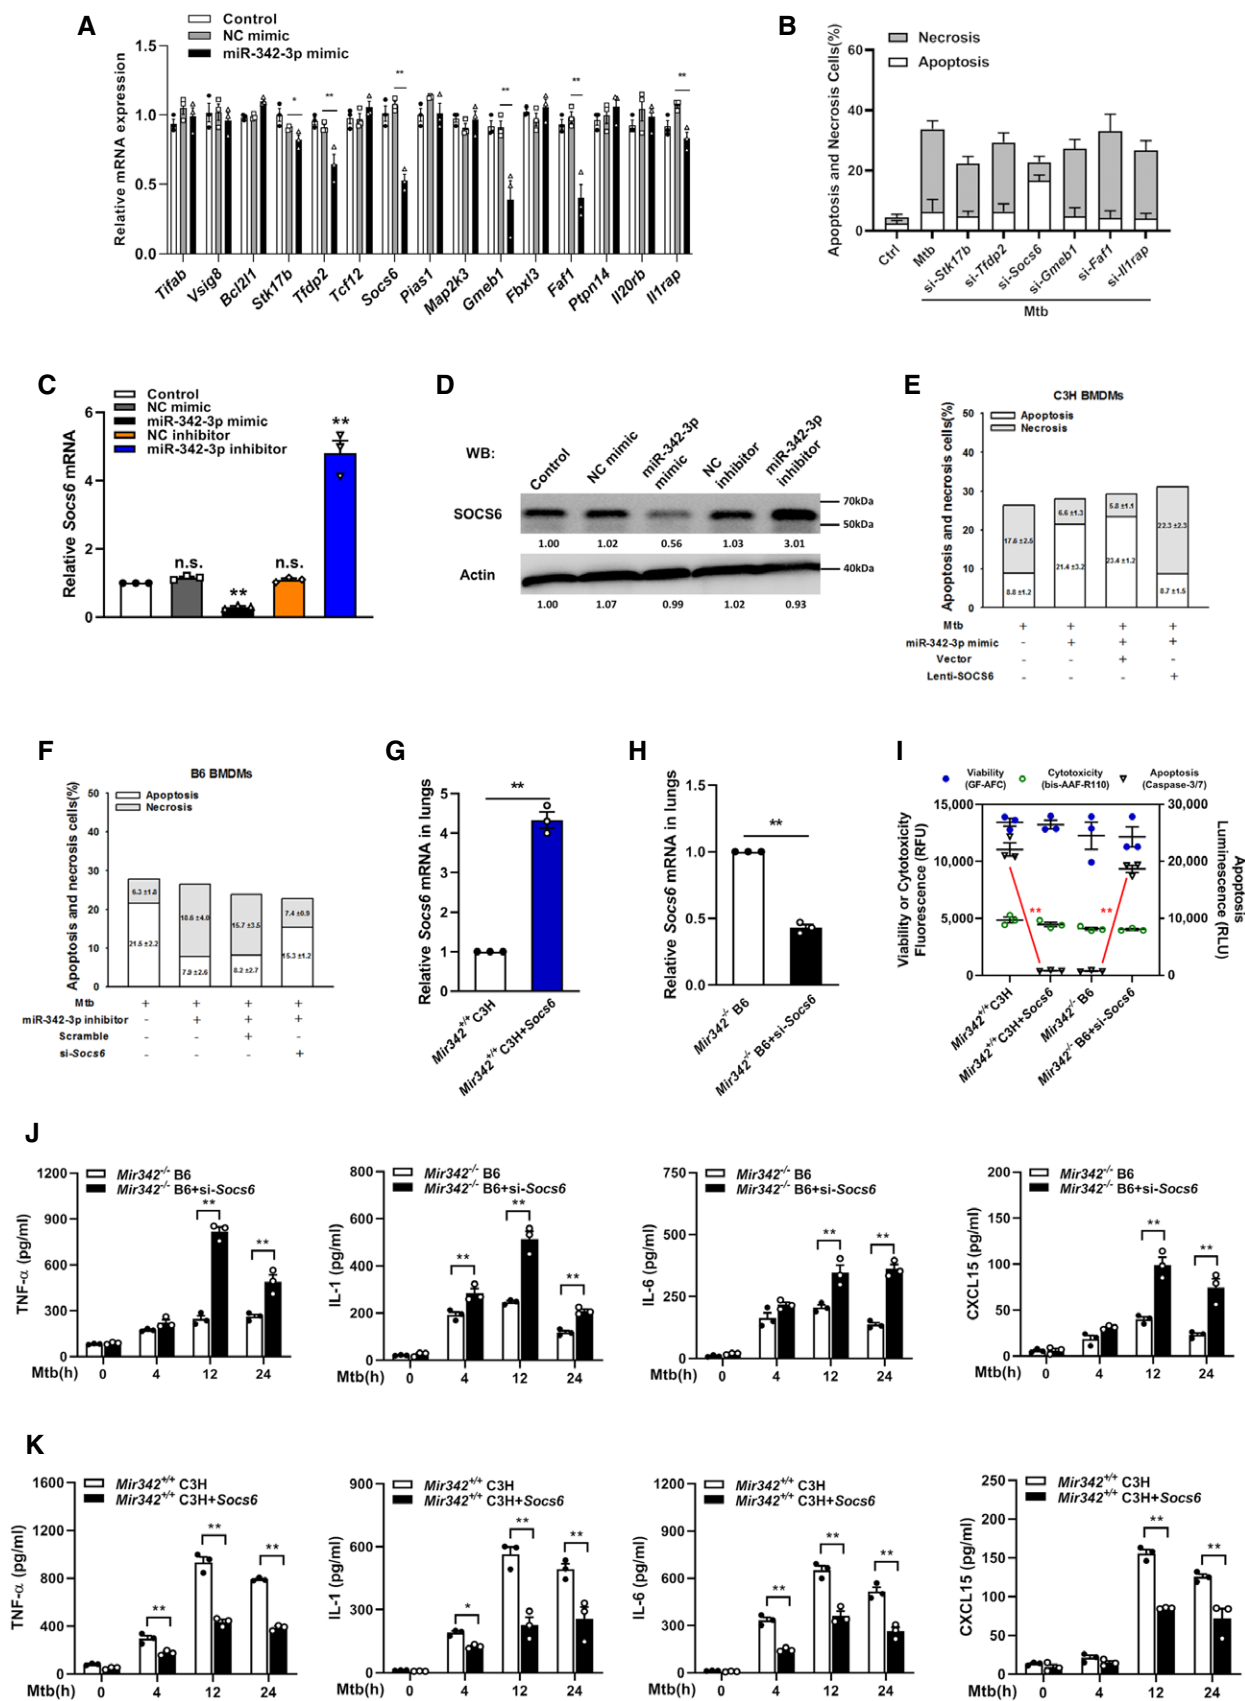

Figure EV2.

**Figure EV3. SOCS6 has no effects on IFN- $\gamma$ , caspase 2, and caspase 9.**

- A Phosphorylation states of STAT family members in response to Mtb stimulation (4 h) in *Socs6*<sup>+/+</sup> or *Socs6*<sup>-/-</sup> BMDMs were examined by Western blotting. Representative blots from *n* = 3 biological replicates are shown.
- B Phosphorylation states of STAT1 and STAT3 in response to Mtb stimulation (4 h) in *Socs6*<sup>+/+</sup> BMDMs were examined by Western blotting. Fludarabine treatment concentration was 10  $\mu$ M, and the treatment time was 24 h. Representative blots from *n* = 3 biological replicates are shown.
- C Phosphorylation states of STAT1 in response to Mtb stimulation in *Socs6*<sup>+/+</sup> BMDMs were examined by Western blotting. Representative blots from *n* = 3 biological replicates are shown.
- D Intracellular localization of STAT1 in Mtb-stimulated *Socs6*<sup>+/+</sup> and *Socs6*<sup>-/-</sup> BMDMs were detected by immunofluorescence. Representative images from *n* = 3 biological replicates are shown. Scale bar = 100  $\mu$ m.
- E, F Relative expressions of chemokines CCL5, CXCL10, ICAM1, and caspase 3, caspase 7, caspase 8 in Mtb-stimulated *Socs6*<sup>+/+</sup> (E) or *Socs6*<sup>-/-</sup> (F) BMDMs were detected by Western blotting. Representative blots from *n* = 3 biological replicates are shown.
- G ELISA was performed to detect the secretion of IFN- $\gamma$  in *Socs6*<sup>+/+</sup> and *Socs6*<sup>-/-</sup> BMDMs during Mtb stimulation. Data are shown as the mean  $\pm$  SEM of *n* = 3 biological replicates.
- H, I caspase 2, caspase 9 in Mtb-stimulated *Socs6*<sup>+/+</sup> or *Socs6*<sup>-/-</sup> BMDMs were detected by qRT-PCR (H, data are shown as the mean  $\pm$  SEM of *n* = 3 biological replicates) and Western blotting (I, representative blots from *n* = 3 biological replicates are shown).
- J, K Caspase 8 in STAT1-suppressed *Socs6*<sup>-/-</sup> BMDMs were detected by qRT-PCR (J, data are shown as the mean  $\pm$  SEM of *n* = 3 biological replicates) and Western blotting (K, representative blots from *n* = 3 biological replicates are shown). Fludarabine (10  $\mu$ M) was used to treat *Socs6*<sup>-/-</sup> BMDMs for 24 h to specifically suppress the activation of STAT1.

Data information: ANOVA followed by Bonferroni post hoc test (G, H, J) was used for data analysis. \*\**P* < 0.01. Abbreviation: n.s., not significant. Source data are available online for this figure.

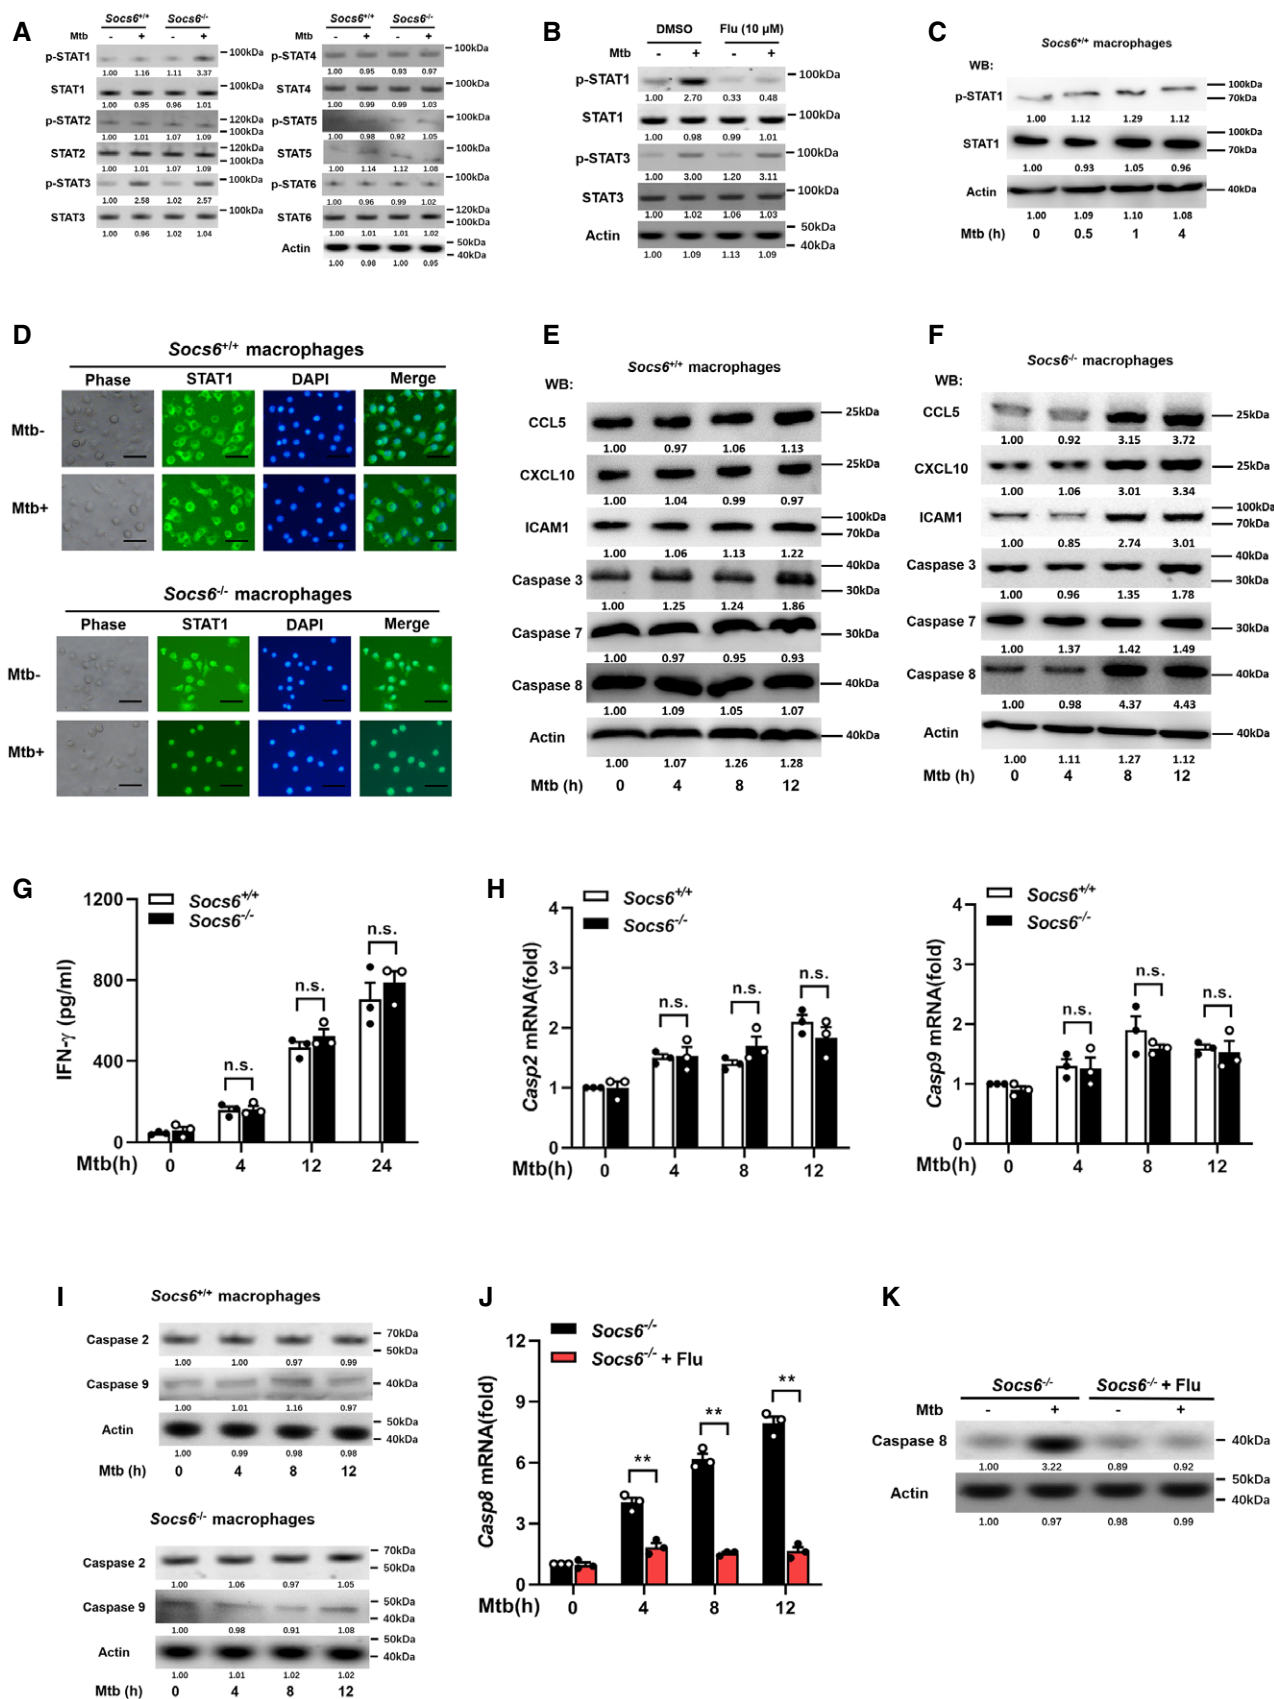

Figure EV3.

**Figure EV4. RIPK3 is critical for SOCS6-regulated cell death mechanisms.**

- A Relative expressions of RIPK1 and RIPK3 were analyzed by Western blotting in *Socs6*<sup>+/+</sup> BMDMs stimulated with Mtb for 0–24 h. Representative blots from *n* = 3 biological replicates are shown.
- B *Socs6*<sup>+/+</sup> BMDMs were stimulated with Mtb for 0–24 h, and cell lysates were collected and immunoprecipitated using an anti-RIPK1 antibody. The recruitment of caspase 8, RIPK3, FADD, and MLKL was analyzed by immunoblots. The lower panel represents the immunoblot analysis of whole cell lysates. Representative blots from *n* = 3 biological replicates are shown.
- C Cell death mechanisms of Mtb-infected *Socs6*<sup>-/-</sup> BMDMs that were transfected with plasmids expressing Myc-RIPK3 or Myc-RIPK3 K51A mutant as indicated. Representative data (from *n* = 3 biological replicates) are shown as the mean ± SEM of technical replicates.
- D *Socs6*<sup>+/+</sup> BMDMs were transfected with *Ripk3* siRNA or *Mlkl* siRNA for 24 h. Afterward, transfected cells were stimulated with Mtb for 12 h, and cell lysates were collected and immunoprecipitated using an anti-RIPK1 antibody. The recruitment of caspase 8, RIPK3, FADD, and MLKL was analyzed by immunoblot. The lower panel represents the immunoblot analysis of whole cell lysates. Representative blots from *n* = 3 biological replicates are shown.
- E–H Cell viabilities (E, data are shown as the mean ± SEM of *n* = 3 biological replicates), cell death mechanisms [F, data are shown as the mean ± SEM of *n* = 3 biological replicates. G, representative data (from *n* = 3 biological replicates) are shown as the mean ± SEM of technical replicates], or Mtb growth rates (H, data are shown as the mean ± SEM of *n* = 3 biological replicates) of Mtb-infected *Socs6*<sup>+/+</sup> BMDMs that were transfected with *Ripk3* siRNA or *Mlkl* siRNA as indicated. Z-VAD treatment concentration was 20 μM, and the treatment time was 24 h.
- I Cell death mechanisms of *Socs6*<sup>-/-</sup> BMDMs transfected with plasmids expressing Myc-MLKL and stimulated with Mtb for 36 h. Data are shown as the mean ± SEM of *n* = 3 biological replicates.
- J Cell viabilities of *Socs6*<sup>-/-</sup> BMDMs transfected with plasmids expressing Myc-MLKL for 24 h and stimulated with Mtb or z-VAD for 24 h. Data are shown as the mean ± SEM of *n* = 3 biological replicates.
- K Mtb growth rates of *Socs6*<sup>-/-</sup> BMDMs transfected with plasmids expressing Myc-MLKL and stimulated with Mtb for 0–120 h. Data are shown as the mean ± SEM of *n* = 3 biological replicates.

Data information: ANOVA followed by Bonferroni post hoc test (E, F, H–K) was used for data analysis. \**P* < 0.05, \*\**P* < 0.01. Abbreviation: n.s., not significant. Source data are available online for this figure.

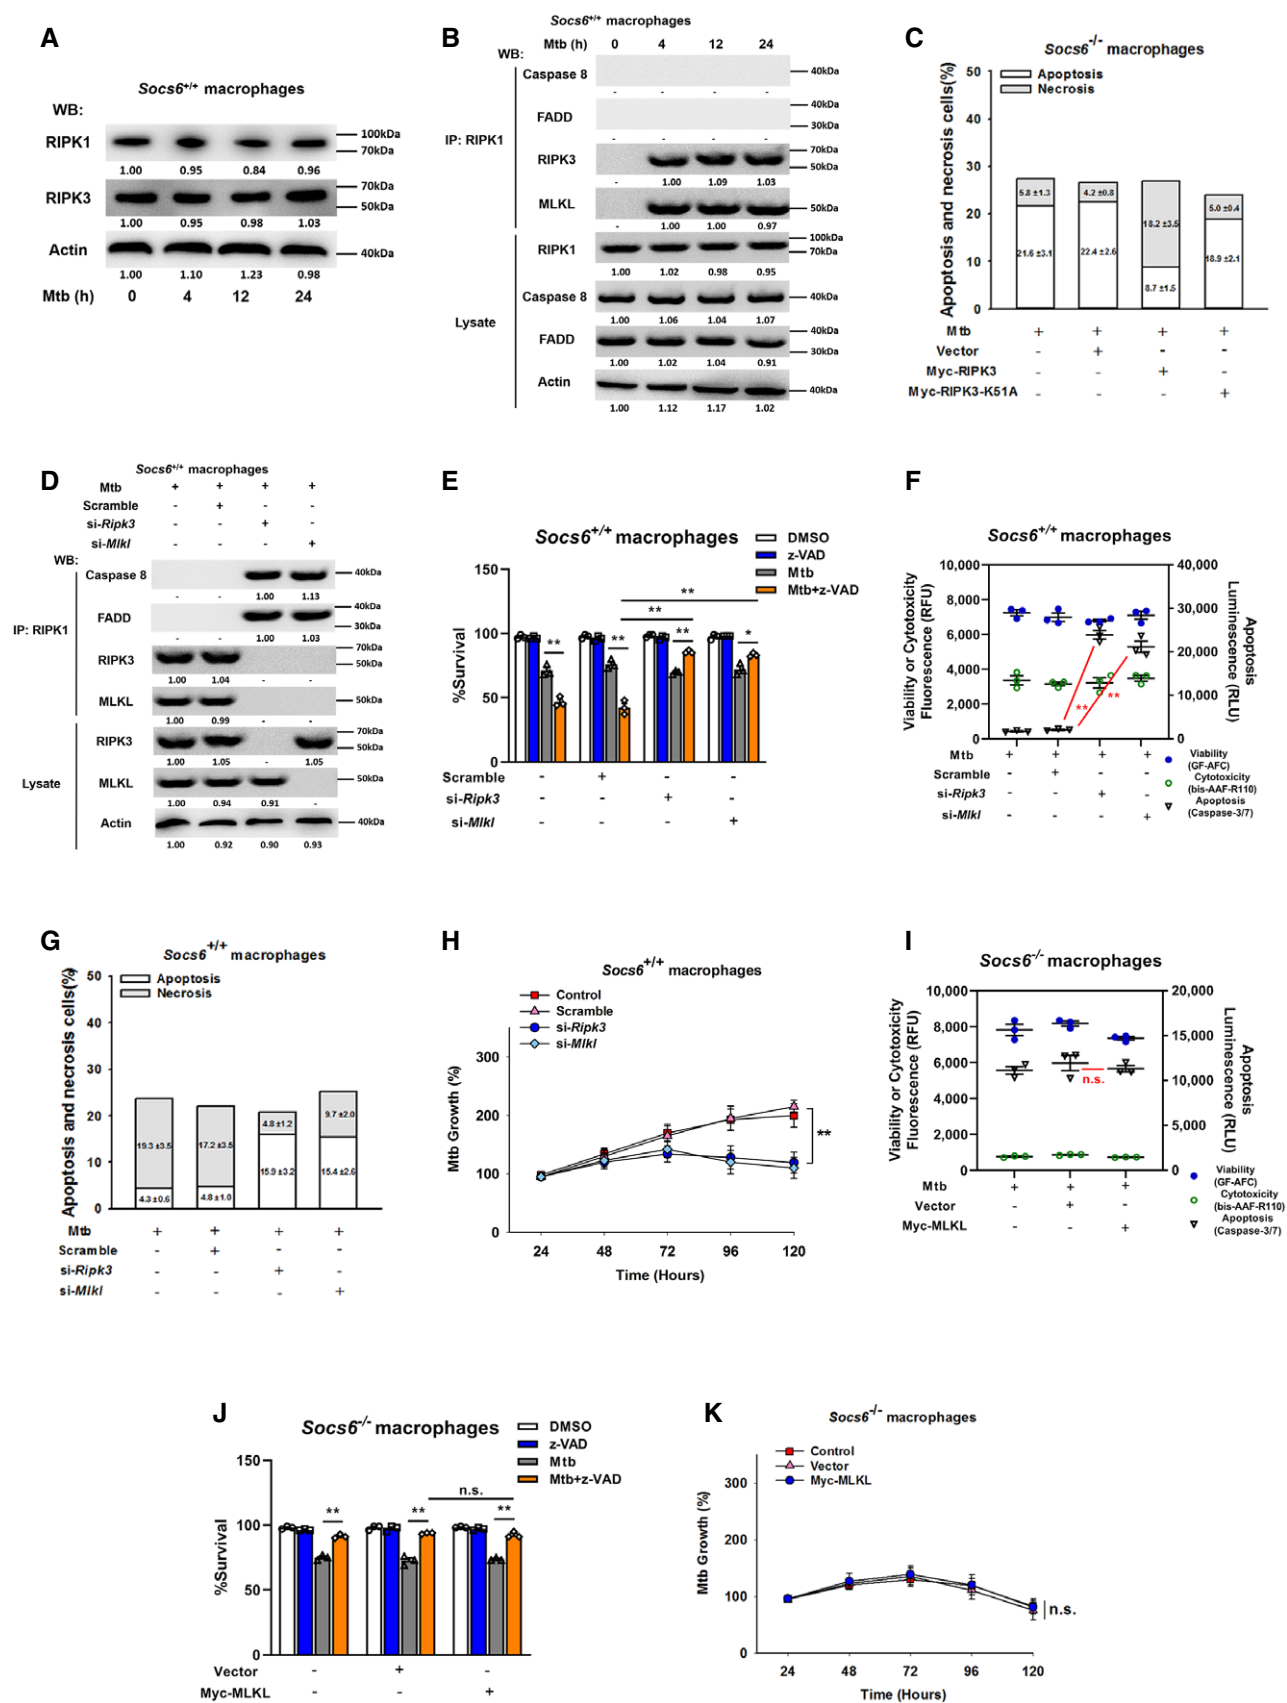

Figure EV4.
