# Supplementary material
Source: PubMed Central journal article supplement (PMC8419689)
Supplement: EMBR-22-e52252-s005.pdf [file EMBR-22-e52252-s005.pdf]

## Appendix

**Title:** MiR-342 controls Mycobacterium tuberculosis susceptibility by modulating inflammation and cell death

**Authors:** Beibei Fu<sup>1,#</sup>, Xiaoyuan Lin<sup>1,#</sup>, Shun Tan<sup>4,#</sup>, Rui Zhang<sup>5,#</sup>, Weiwei Xue<sup>6</sup>, Haiwei Zhang<sup>7</sup>, Shanfu Zhang<sup>1</sup>, Qingting Zhao<sup>1</sup>, Yu Wang<sup>8</sup>, Kelly Feldman<sup>9</sup>, Lei Shi<sup>1</sup>, Shaolin Zhang<sup>6</sup>, Weiqi Nian<sup>7</sup>, Krishna Chaitanya Pavani<sup>10</sup>, Zhifeng Li<sup>1,3,\*</sup>, Xingsheng Wang<sup>2,\*</sup> and Haibo Wu<sup>1,\*</sup>

# These authors contributed equally to this work

\***Corresponding author:** Haibo Wu, School of Life Sciences, Chongqing University, Chongqing 401331, China; E-mail: hbwu023@cqu.edu.cn

Xingsheng Wang, Department of Respiratory Medicine, Affiliated Central Hospital of Chongqing University, Chongqing 400014, China; E-mail: xingswang@163.com

Zhifeng Li, School of Life Sciences, Chongqing University; Chongqing Center for Disease Control and Prevention, Chongqing 400042, China; E-mail: qc\_zhifengli@126.com

Appendix Figures and Figure Legends S1-S4 2-6

Appendix Tables S1-S3 7-9

## Appendix Figures and Figure Legends

### Appendix Figure S1 Validation of *Mir342*<sup>+/+</sup>C3H and *Mir342*<sup>-/-</sup>B6 mice

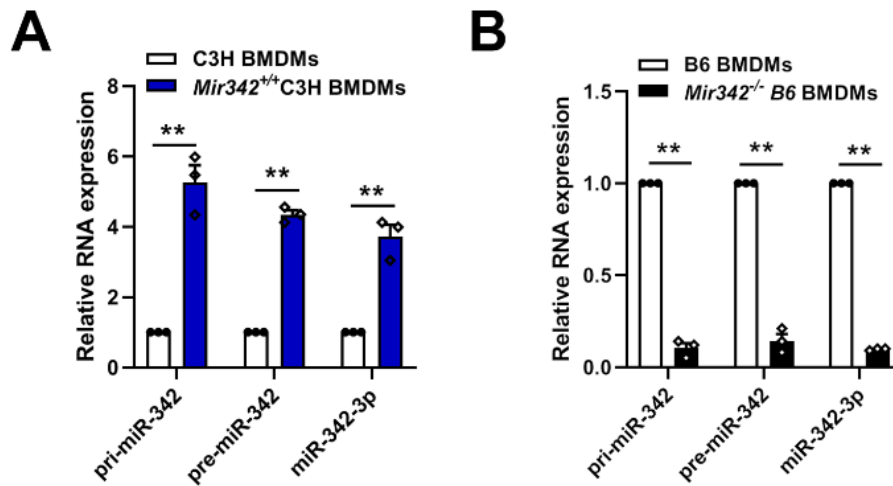

(A, B) Relative expressions of miR-342-3p in BMDMs from *Mir342*<sup>+/+</sup>C3H (A) and *Mir342*<sup>-/-</sup>B6 (B) mice were analyzed by qRT-PCR. Data are shown as the mean  $\pm$  s.e.m. of n = 3 biological replicates.

Data information: ANOVA followed by Bonferroni post *hoc* test was used for data analysis. \*\*, p < 0.01.

## Appendix Figure S2 A20 promotes K48-linked polyubiquitination of RIPK3

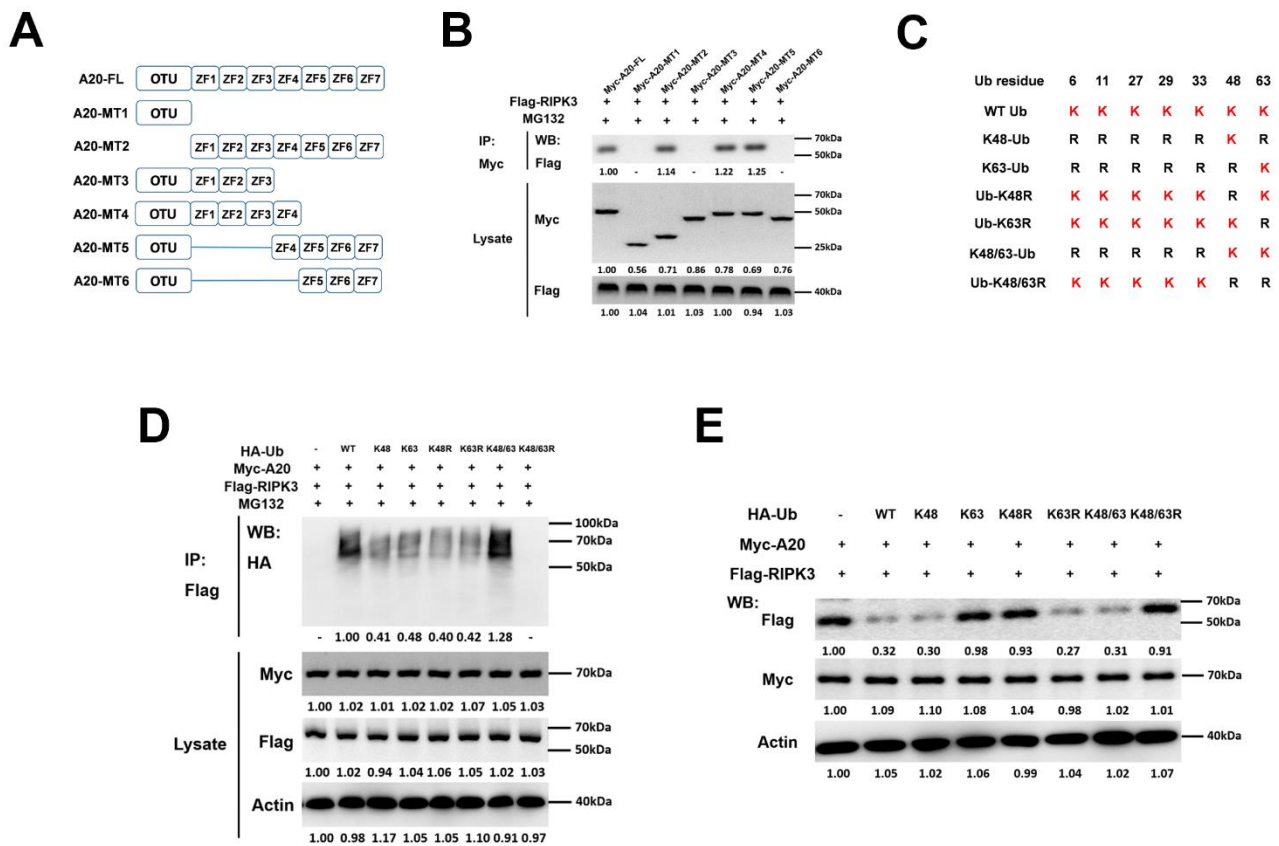

(A, B) Schematic of full-length or truncated A20 (A) and results from immunoprecipitation assays showing the binding regions between A20 and RIPK3 (B, representative blots from  $n = 3$  biological replicates are shown).

(C-E) Schematic of wild-type or mutated ubiquitin (K, Lysine; R, Arginine) (C), and results from immunoprecipitation assays showing the specific lysine-linked ubiquitin chains of RIPK3 (D, E, representative blots from  $n = 3$  biological replicates are shown). The lower panels of blots represent the immunoblot analysis of whole cell lysates.

Appendix Figure S3 **A20-mediated cell death mechanism is independent of inflammatory responses**

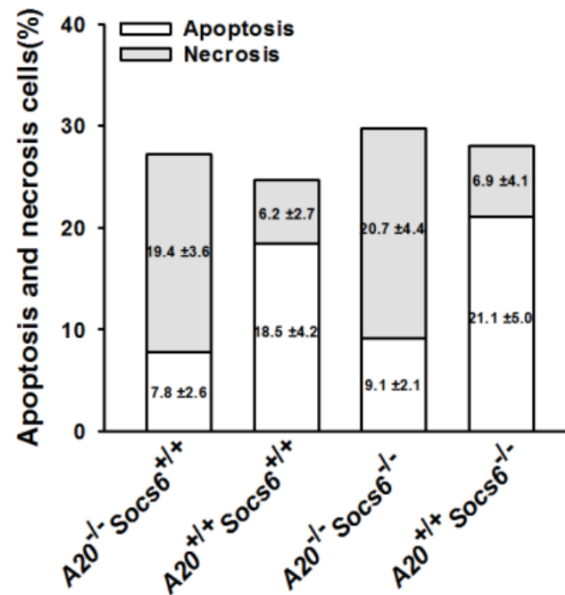

Cell death mechanisms of *A20*<sup>-/-</sup> *Socs6*<sup>+/+</sup>, *A20*<sup>+/+</sup> *Socs6*<sup>+/+</sup>, *A20*<sup>-/-</sup> *Socs6*<sup>-/-</sup> and *A20*<sup>+/+</sup> *Socs6*<sup>-/-</sup> BMDMs stimulated with Mtb. Representative data (from n = 3 biological replicates) are shown as the mean ± s.e.m. of technical replicates.

Appendix Figure S4 The effect of miR-342-3p and SOCS6 on SOCS and STAT

family members

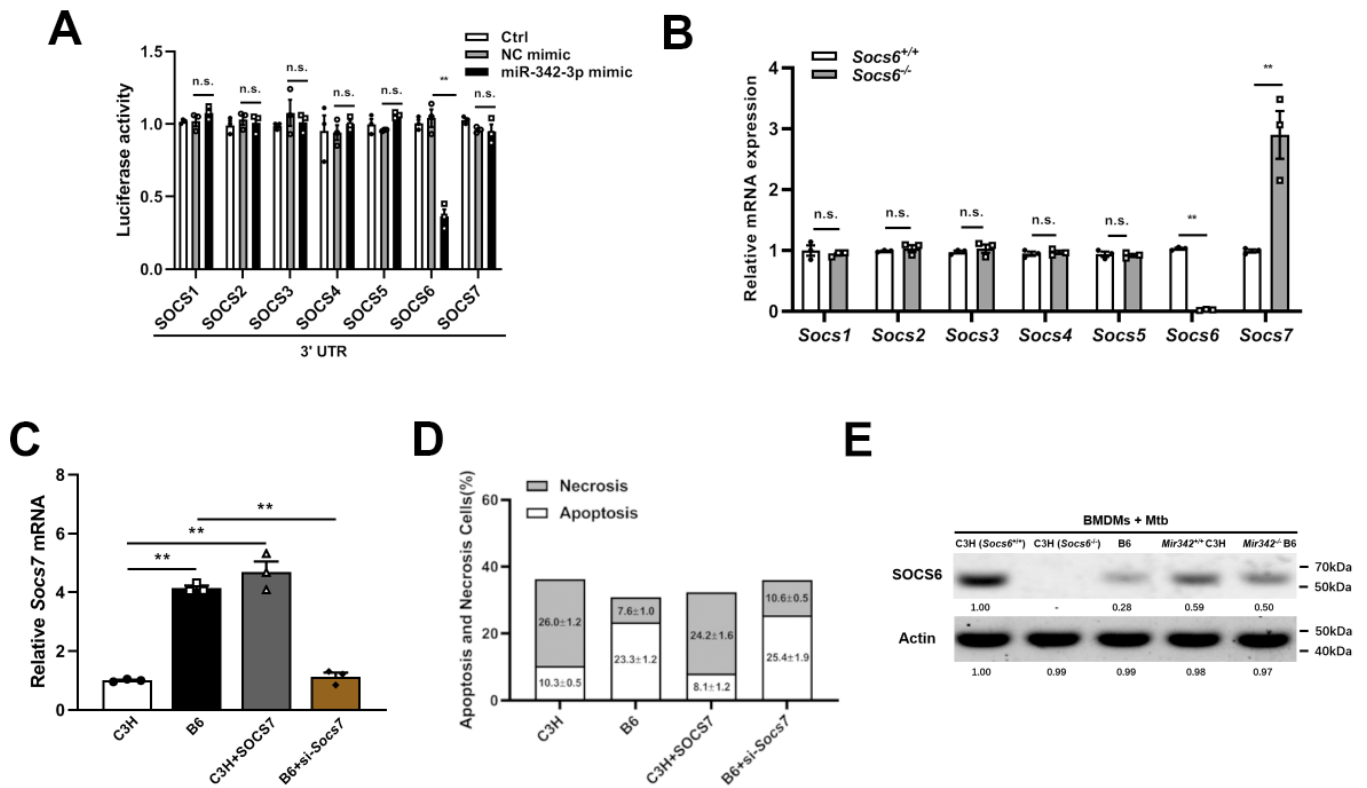

(A) HEK-293T fibroblasts were co-transfected with miR-342-3p mimic and luciferase reporter construct containing UTRs of SOCS family members. After 24 hours, cells were collected for luciferase assays. Data are shown as the mean  $\pm$  s.e.m. of  $n = 3$  biological replicates.

(B) Expression levels of SOCS family members in *Socs6*<sup>+/+</sup> or *Socs6*<sup>-/-</sup> BMDMs were examined by qRT-PCR. Data are shown as the mean  $\pm$  s.e.m. of  $n = 3$  biological replicates.

(C) Relative expressions of *Socs7* in BMDMs from C3H, B6, C3H supplemented with SOCS7-overexpressing vector or B6 supplemented with *Socs7* siRNA were analyzed by qRT-PCR. Data are shown as the mean  $\pm$  s.e.m. of  $n = 3$  biological replicates.

(D) Cell death mechanisms of BMDMs from C3H, B6, C3H supplemented with

SOCS7-overexpressing vector or B6 supplemented with *Socs7* siRNA, followed by Mtb infection for 36 hours. Representative data (from n = 3 biological replicates) are shown as the mean  $\pm$  s.e.m. of technical replicates.

(E) SOCS6 expression levels in C3H (*Socs6*<sup>+/+</sup>), C3H (*Socs6*<sup>-/-</sup>), B6, *Mir342*<sup>+/+</sup>C3H and *Mir342*<sup>-/-</sup>B6 mice were detected by western blotting. Representative blots from n = 3 biological replicates are shown.

Data information: ANOVA followed by Bonferroni post *hoc* test (A-C) was used for data analysis. \*\*, p < 0.01. Abbreviations: n.s., not significant.

## Appendix Tables

**Appendix Table S1 Gross pathology of mice infected with Mtb**

| Animal Group                                     | Lung Score | Mean $\pm$ s.e.m.* |
|--------------------------------------------------|------------|--------------------|
|                                                  | 0          |                    |
| B6                                               | 0          | 0                  |
|                                                  | 0          |                    |
|                                                  | 12         |                    |
| <i>Mir342</i> <sup>-/-</sup> B6                  | 13         | 11.33 $\pm$ 1.20   |
|                                                  | 9          |                    |
|                                                  | 14         |                    |
| C3H                                              | 10         | 13.67 $\pm$ 2.02   |
|                                                  | 17         |                    |
|                                                  | 4          |                    |
| <i>Mir342</i> <sup>+/+</sup> C3H                 | 8          | 5.00 $\pm$ 1.53    |
|                                                  | 3          |                    |
|                                                  | 5          |                    |
| <i>Mir342</i> <sup>-/-</sup> B6+si- <i>Socs6</i> | 5          | 5.67 $\pm$ 0.67    |
|                                                  | 7          |                    |
|                                                  | 14         |                    |
| <i>Mir342</i> <sup>+/+</sup> C3H+ <i>Socs6</i>   | 11         | 11.67 $\pm$ 1.20   |
|                                                  | 10         |                    |

**\*Median values per group (n = 3)**

**Appendix Table S2 Primers used for plasmids construction**

| <b>Name</b>                         | <b>Forward</b>                | <b>Reverse</b>                  |
|-------------------------------------|-------------------------------|---------------------------------|
| psicheck-2-Socs6<br>3'UTR WT        | AATCCTCGAGTCTTGCACTTTGGGGTTC  | GCAAGCGGCCGCCAGGGTTATCTTACTTTTG |
| psicheck-2-Socs6<br>3'UTR site1 mut | TTATTCGAGGTAGTCATCA           | GATGACTACCTCGAATAA              |
| psicheck-2-Socs6<br>3'UTR site2 mut | AGAATCGAGGTTTATCTTTC          | AAGATAAACCTCGATTCTAA            |
| Myc-Ago2                            | AACGGAATTCCCACCATGTACTCGGG    | TCAAGCGGCCGCATTAAAGTGTTTTAA     |
| Myc-RIPK3                           | AACTGAATTCCGACGATGTCTTCTGTGTC | TCAAGCGGCCGCTCCAAGTGTCTCA       |
| Myc-RIPK3 K51A                      | TGTAGCAGTCGCGATCGTGA          | GTTACGATCGCGACTGCTA             |
| Myc-A20                             | AATCGAATTCGGACCATGGCTGAACA    | TCAAGCGGCCGCCAGGCTGACCCTGAC     |
| Myc-A20 C103A                       | TGATGGAAACGCCCTCATGC          | TGCATGAGGGCGTTTCCATC            |
| Myc-A20<br>C609/612A                | AGGGCTTTGCCACTCTAGCTTTCAT     | CGATGAAAGCTAGAGTGGCAAAGCC       |
| pcDNA3.1(+)-<br>SOCS6               | AATCGAATTCAAAATGAAGAAAATCA    | TTAAGCGGCCGCAATCTGGTCATTC       |
| Lenti-SOCS6                         | AATCGAATTCAAAATGAAGAAAATCA    | TTAAGCGGCCGCAATCTGGTCATTC       |
| Flag-RIPK3                          | AATAGCGGCCGCGACGATGTCTTCTGTCA | CTAAGAATTCAGTTTGGGTGTAGGTCCAAC  |
| Flag-RIPK3 K51A                     | AGCAGTCGCGATCGTGAAC           | TTCACGATCGCGACTGCTA             |



**Appendix Table S3 Primers used for qRT-PCR**

| <b>Name</b>                     | <b>Forward</b>            | <b>Reverse</b>            |
|---------------------------------|---------------------------|---------------------------|
| pri-miR-342                     | TTGGTTGGCTGGGTTTCAGTT     | GCTCATGCATGCACCACAAA      |
| pre-miR-342                     | GAAAATGGGCTCAAGGTGAGGGGTG | TCAGCAGGCCAAGGTGACGGGTGCG |
| miR-342-3p                      | TCTCACACAGAAATCGCACCCGT   | Universal Primer          |
| miR-342-5p                      | AGGGGTGCTATCTGTGATTGAG    | Universal Primer          |
| <i>Socs6</i>                    | CCTTCAGTACACCGTGCCTT      | GGTCCTGGTCCACATGACTG      |
| <i>Socs1</i>                    | CAACGGAAGTCTTCTTCGC       | AGTCACGGAGTACCGGGTTA      |
| <i>Socs2</i>                    | CAGCTGGACCGACTAACCTG      | GTTGGTAAAGGCAGTCCCCA      |
| <i>Socs3</i>                    | TCACCCACAGCAAGTTTCCC      | CCTCACACTGGATGCGTAGG      |
| <i>Socs4</i>                    | GCTTCGTGTACAGGTGGTCA      | GGAACAAGGCAGTGGACGTA      |
| <i>Socs5</i>                    | CAGGCGGAACCAAACTGTG       | GAGTGGCTTTGACTGCTTGC      |
| <i>Socs7</i>                    | TGATATCAGTGGGACGCTGC      | CCATCTGGCTTCCCCTTCAG      |
| <i>Ccl5</i>                     | CTCACCATATGGCTCGGACA      | GCACTTGCTGCTGGTGTAGA      |
| <i>Cxcl10</i>                   | CCAAGTGCTGCCGTCATTTT      | CTCAACACGTGGGCAGGATA      |
| <i>Icam1</i>                    | CTGGGCTTGGAGACTCAGTG      | CCCACTCTCCGAAACGAA        |
| <i>Caspase 3</i>                | GTCATCTCGCTCTGGTACGG      | CACACACACAAAGCTGCTCC      |
| <i>Caspase 7</i>                | CGGAATGGGACGGACAAAGA      | GAGTTGCTGTGGTCCTCCTC      |
| <i>Caspase 8</i>                | CAGGAGACCATCGAGGATGC      | CCCACCGACTGATGTGGAAA      |
| <i>Caspase 2</i>                | AGGAGGAGCAGGATTTTGGC      | AGGGCTTACAGAAGGCATC       |
| <i>Caspase 9</i>                | ATTCAGCAGGCAGGATCTGG      | ACCAGGTGGTCTAGGGGTTT      |
| <i><math>\beta</math>-actin</i> | GGCTGTATTCCCCTCCATCG      | CCAGTTGGTAACAATGCCATGT    |
