# Supplementary material
Source: PubMed Central journal article supplement (PMC8419689)
Supplement: EMBR-22-e52252-s006.pdf [file EMBR-22-e52252-s006.pdf]

FIG 7A

IP:RIPK3  
WB: Ub

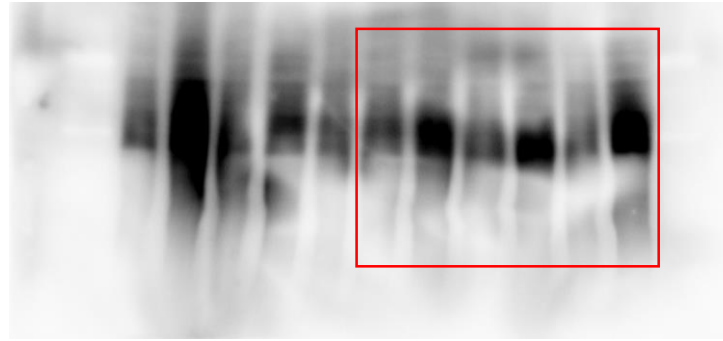

120kDa  
100kDa  
70kDa  
50kDa

RIPK3

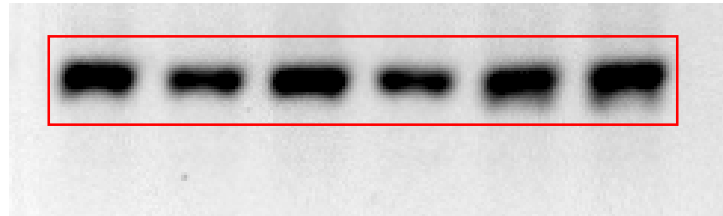

70kDa  
50kDa

Lysate

Actin

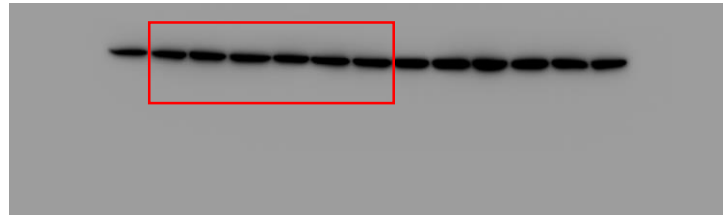

40kDa

**FIG 7B**

IP:RIPK3  
WB: Ub

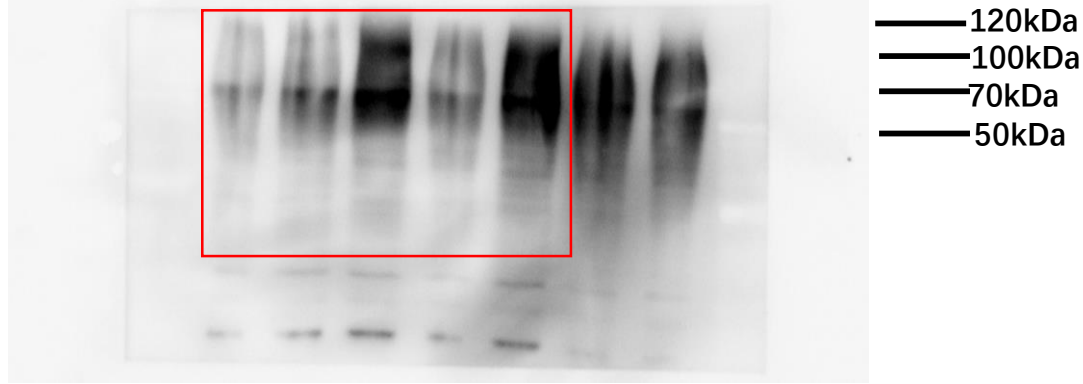

RIPK3

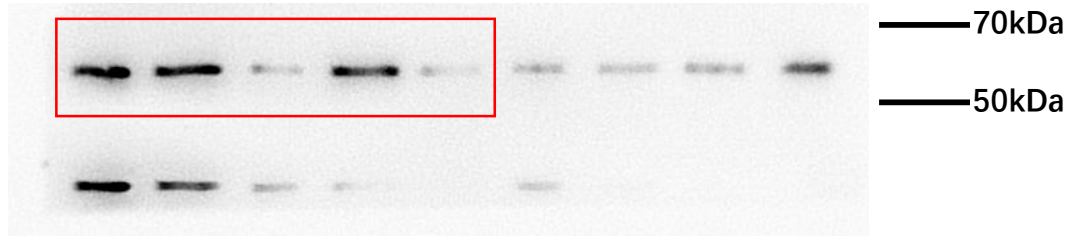

Lysate

A20

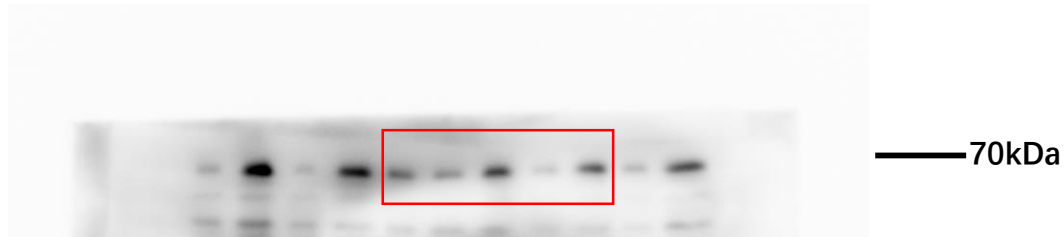

Actin

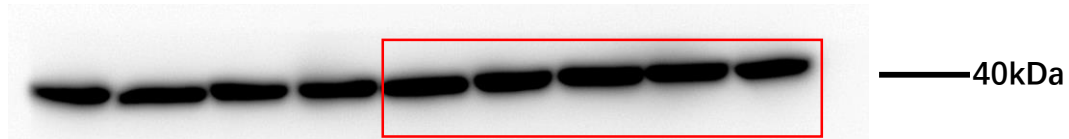

**FIG 7C**

IP:RIPK3  
WB: Ub

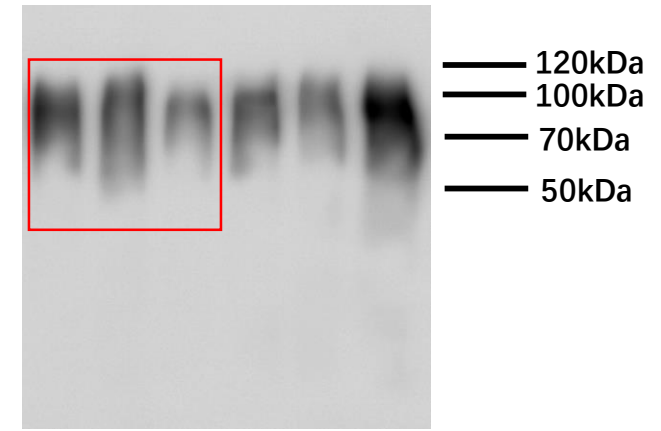

RIPK3

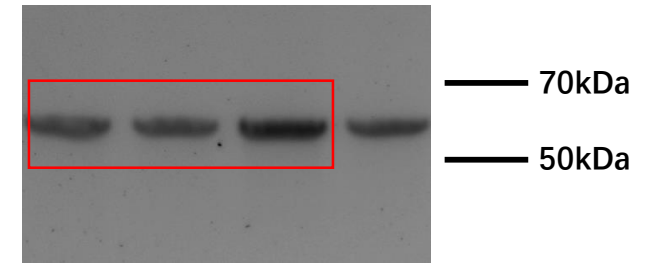

Lysate

A20

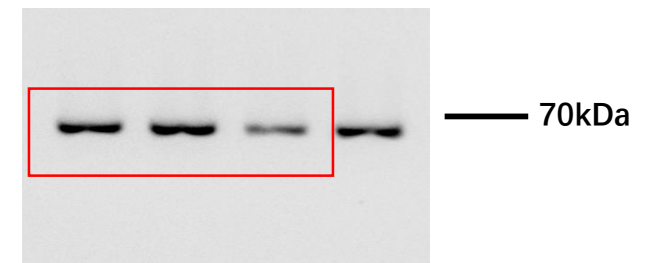

Actin

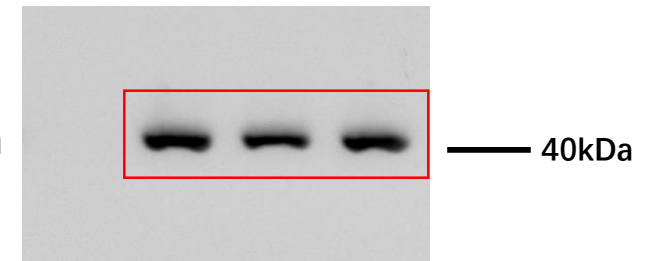

**FIG 7D**

**IP: IgG/  
RIPK3**

**WB: UB**

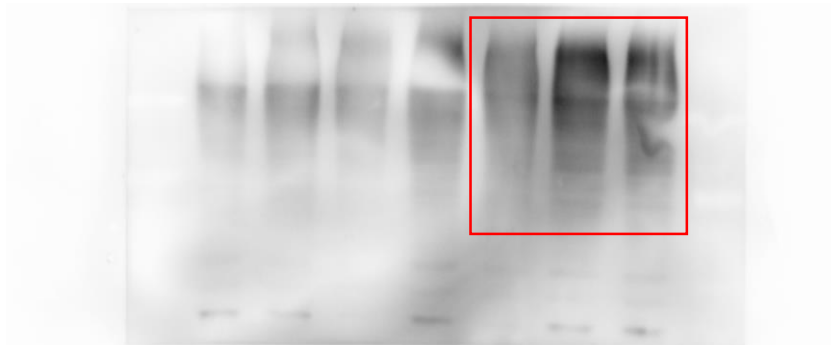

**WB:  
RIPK3**

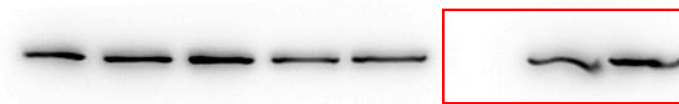

**RIPK3**

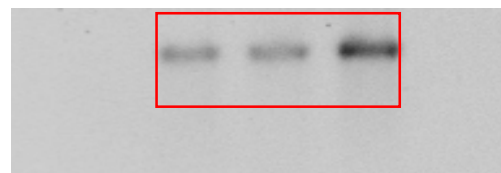

**Lysate**

**A20**

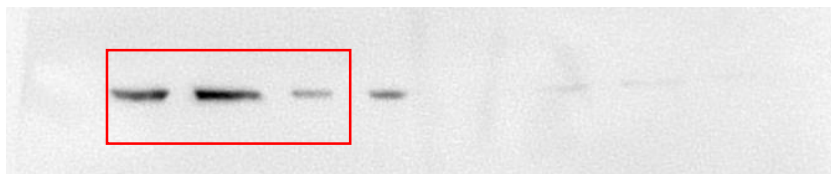

**Actin**

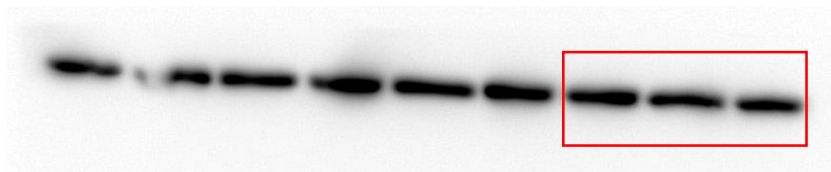

**FIG 7E**

**IP:RIPK3**

**WB: HA**

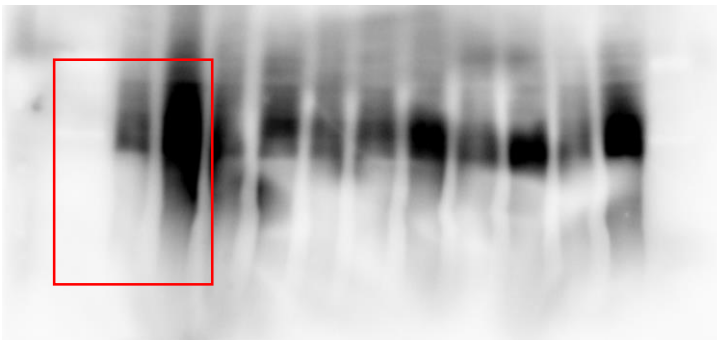

120kDa  
100kDa  
70kDa  
50kDa

**WB:  
Flag**

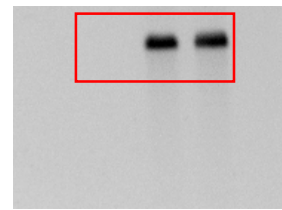

70kDa  
50kDa

**Flag**

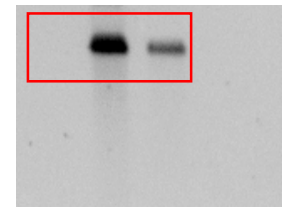

70kDa  
50kDa

**Lysate**

**Myc**

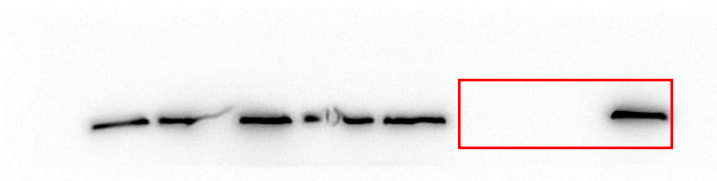

70kDa

**Actin**

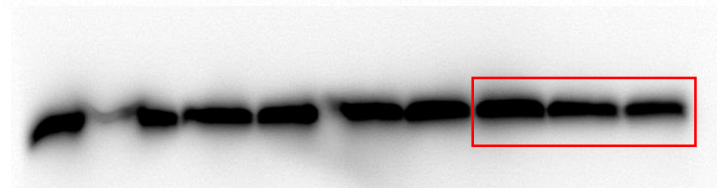

40kDa

FIG 7F

Ub

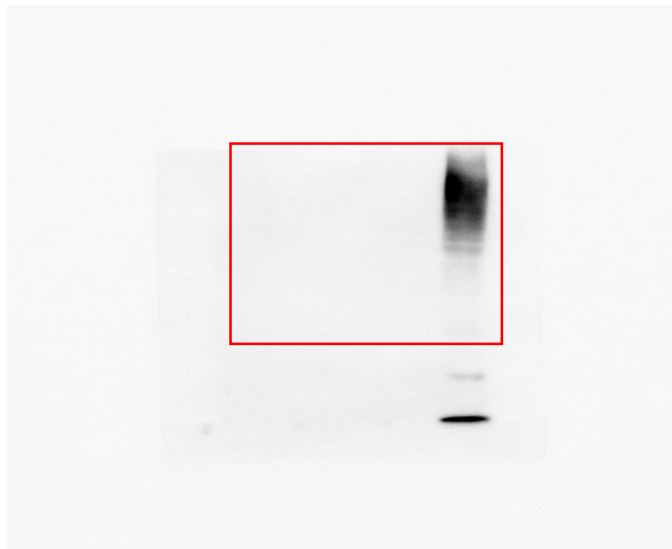

100kDa  
70kDa  
50kDa

FIG 7G

IP:Flag  
WB: HA

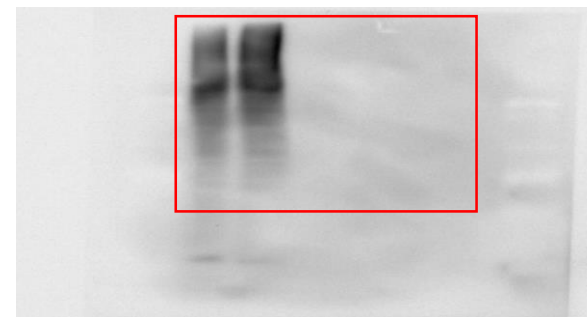

120kDa  
100kDa  
70kDa  
50kDa

Myc

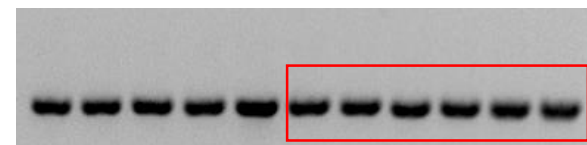

70kDa

Lysate

Flag

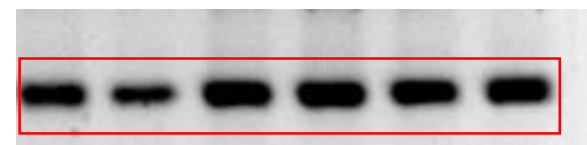

70kDa  
50kDa

Actin

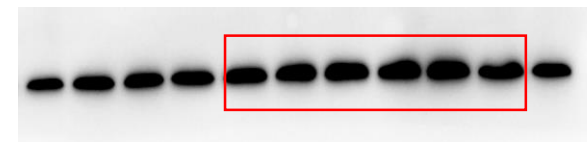

40kDa
