# Supplementary material
Source: PubMed Central journal article supplement (PMC8419689)

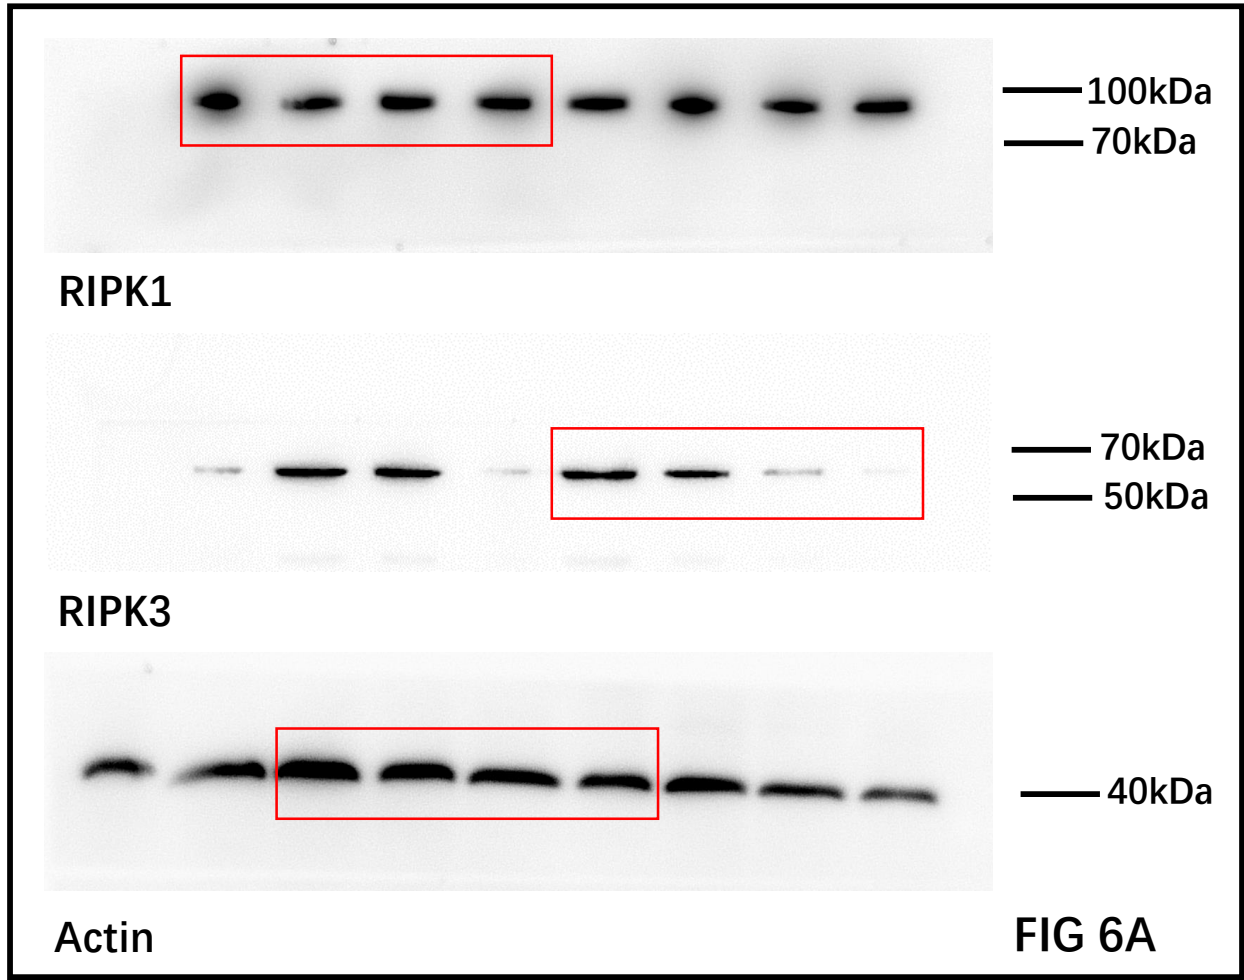

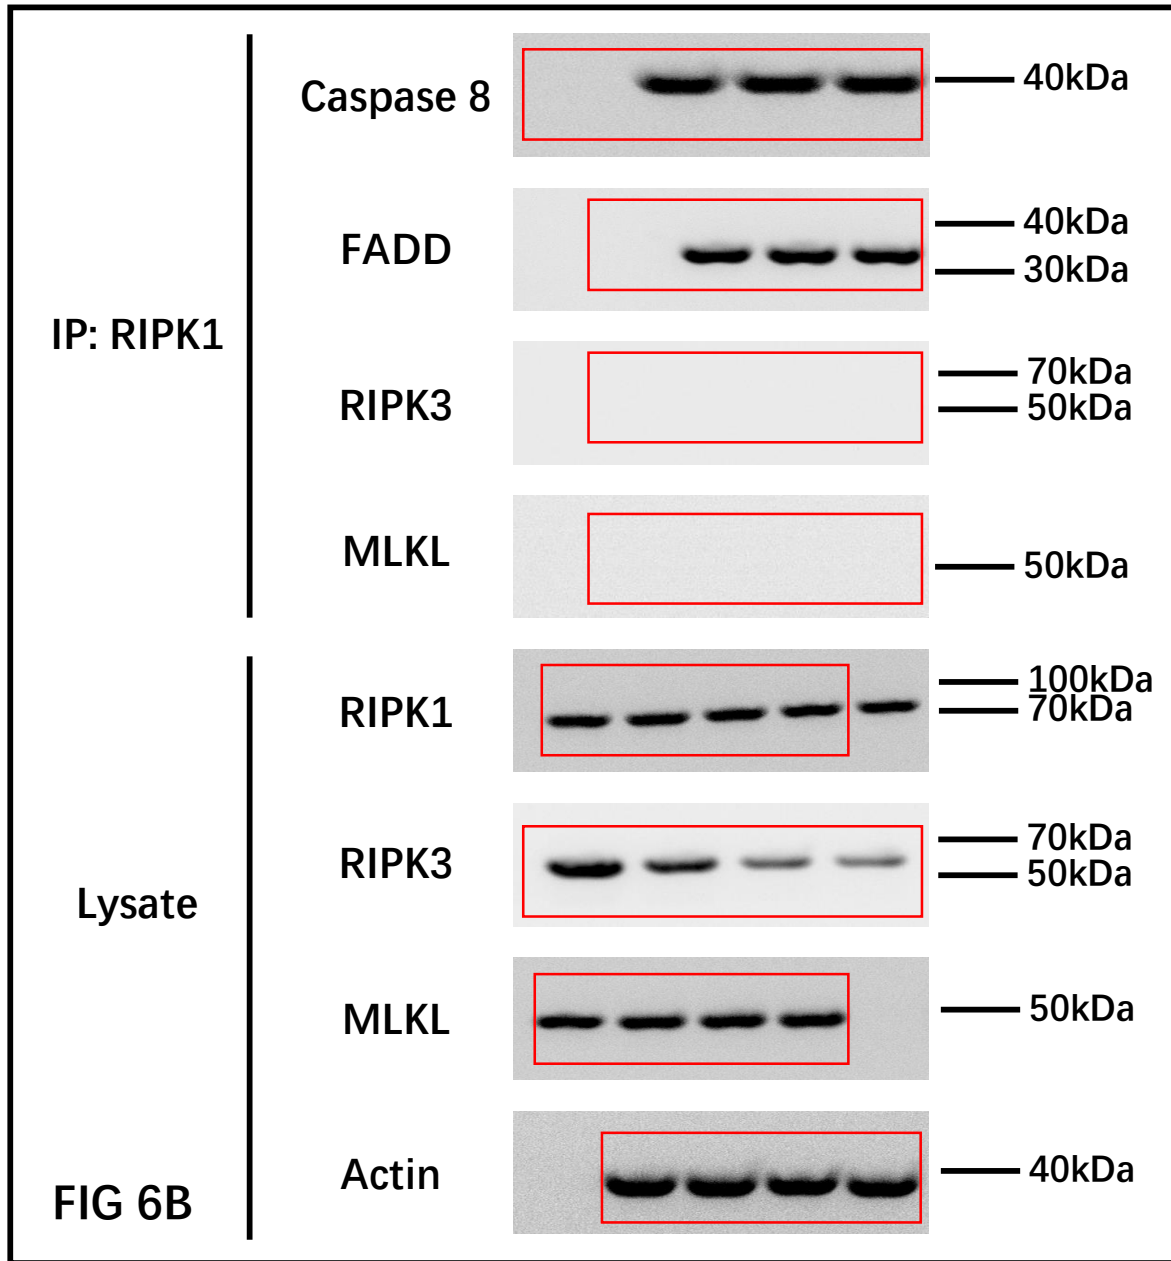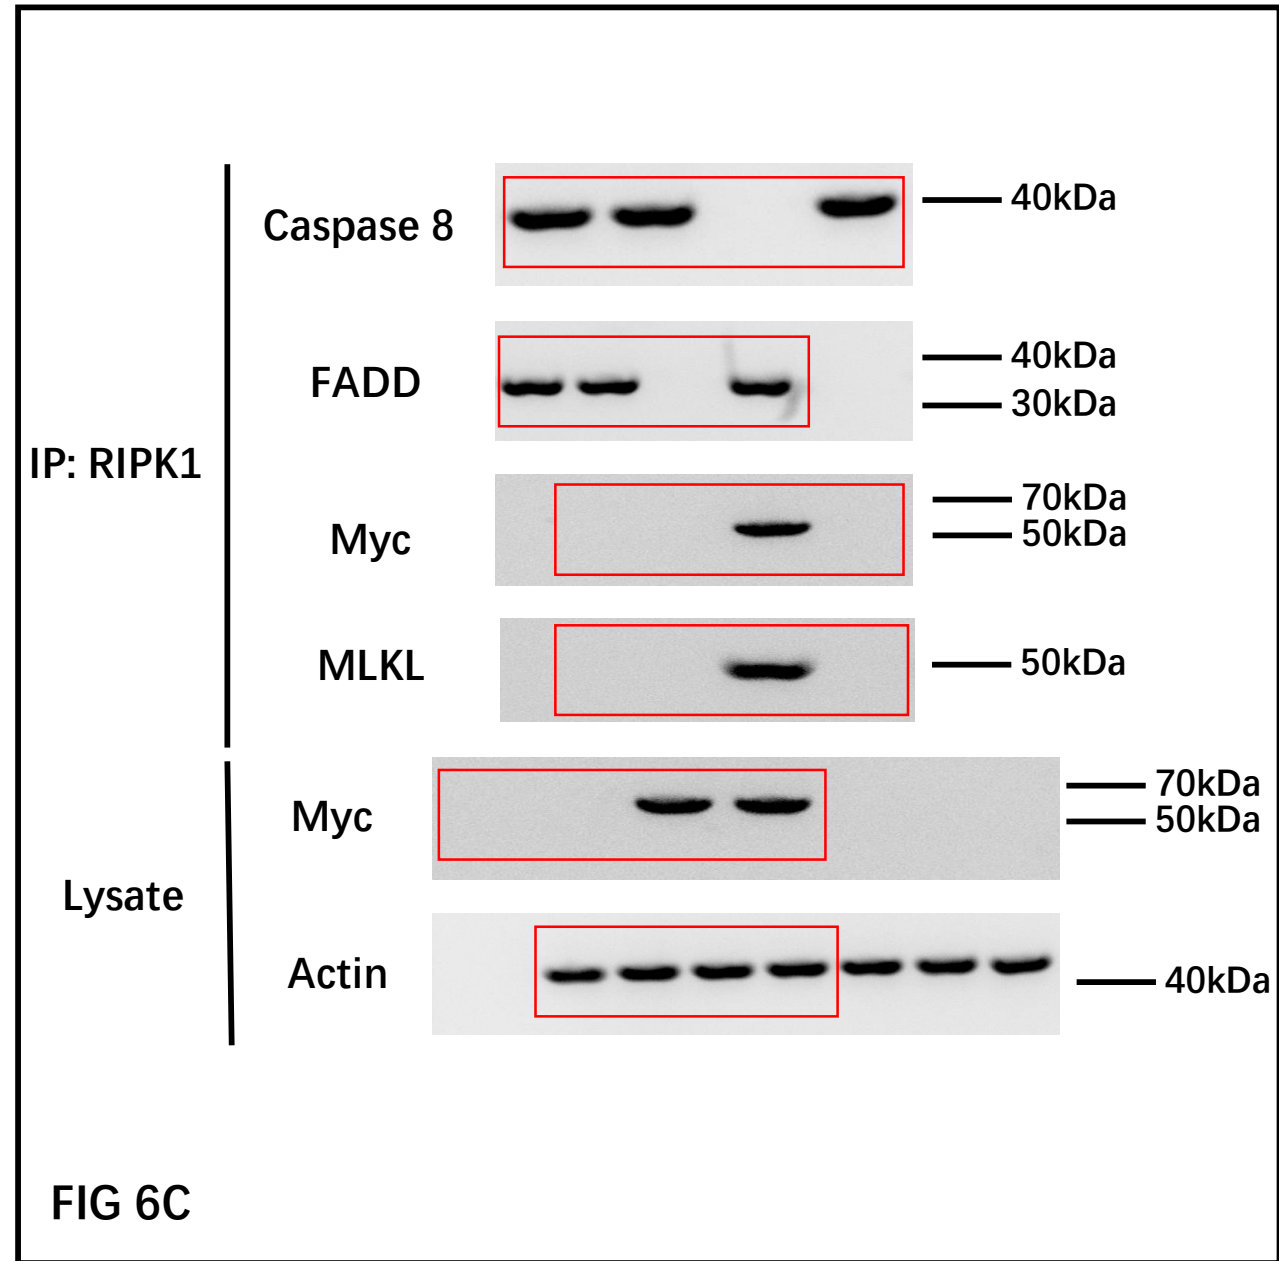

Supplement: EMBR-22-e52252-s001.pdf [file EMBR-22-e52252-s001.pdf]

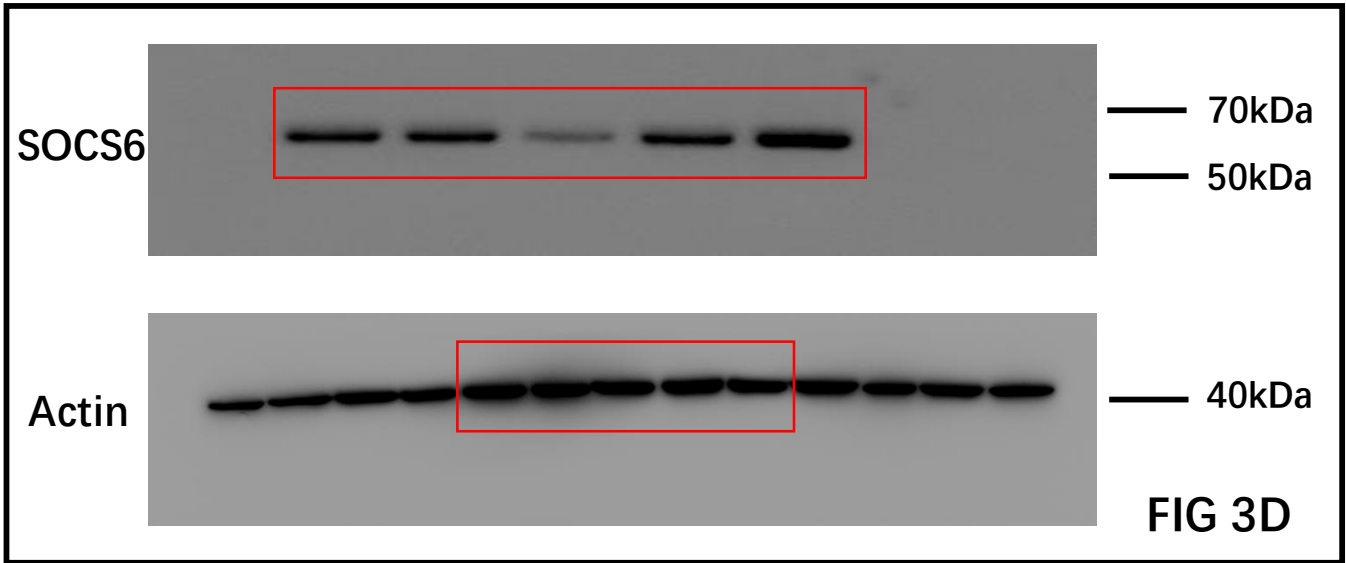

Supplement: EMBR-22-e52252-s003.pdf [file EMBR-22-e52252-s003.pdf]

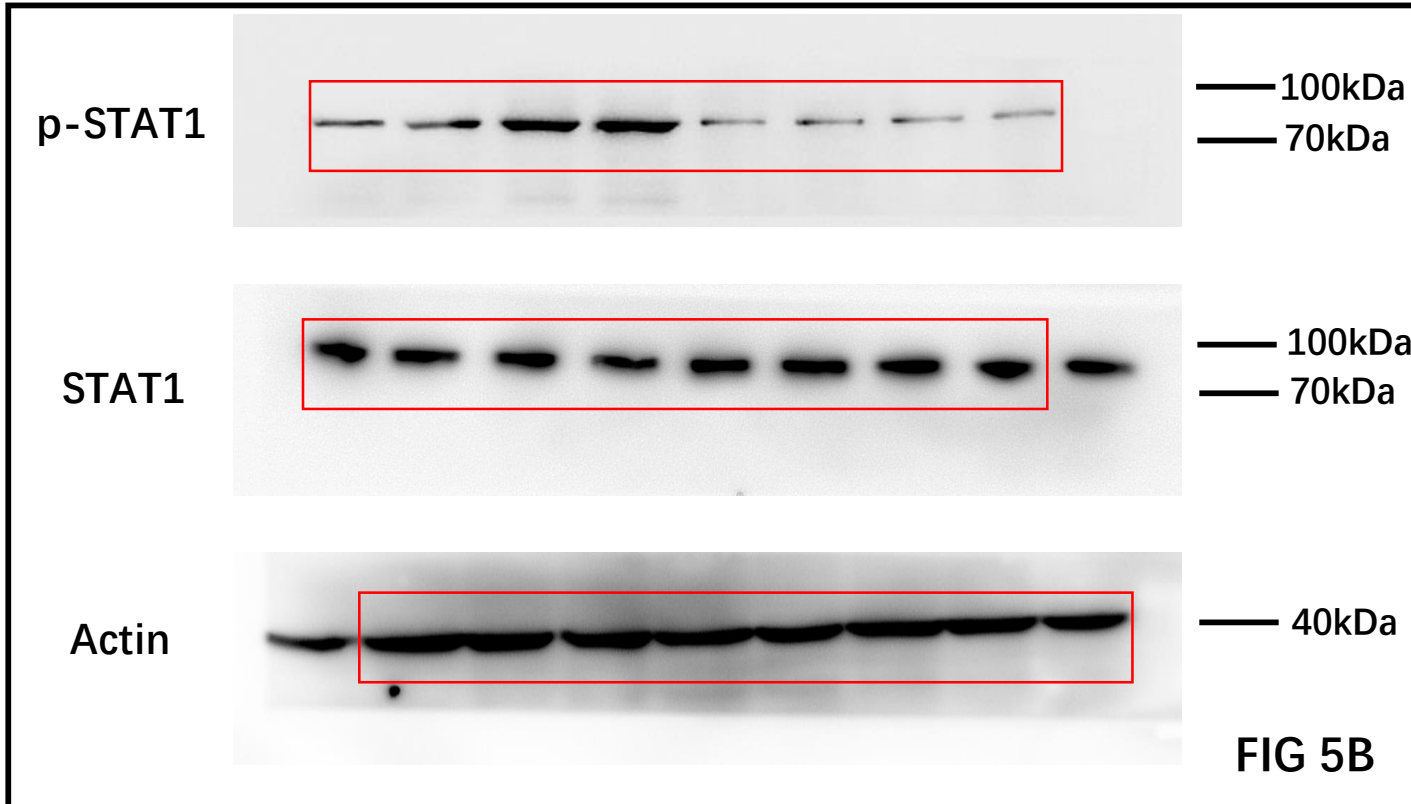

Supplement: EMBR-22-e52252-s009.pdf [file EMBR-22-e52252-s009.pdf]
